# Supplementary material for: Characterizing the timing of Yolk Testosterone Metabolism and the effects of Etiocholanolone on development in Avian Eggs
Source: Oxford University Press journal article supplement (doi:10.1242/jeb.210427), 2020-01-01
Supplement: jeb210427supp.pdf [file jeb210427supp.pdf]

## Dataset 1

[Click here to Download Dataset 1](#)
